# Supplementary material
Source: PubMed Central journal article supplement (PMC6629122)
Supplement: jciinsight-4-126154-s139.pdf [file jciinsight-4-126154-s139.pdf]

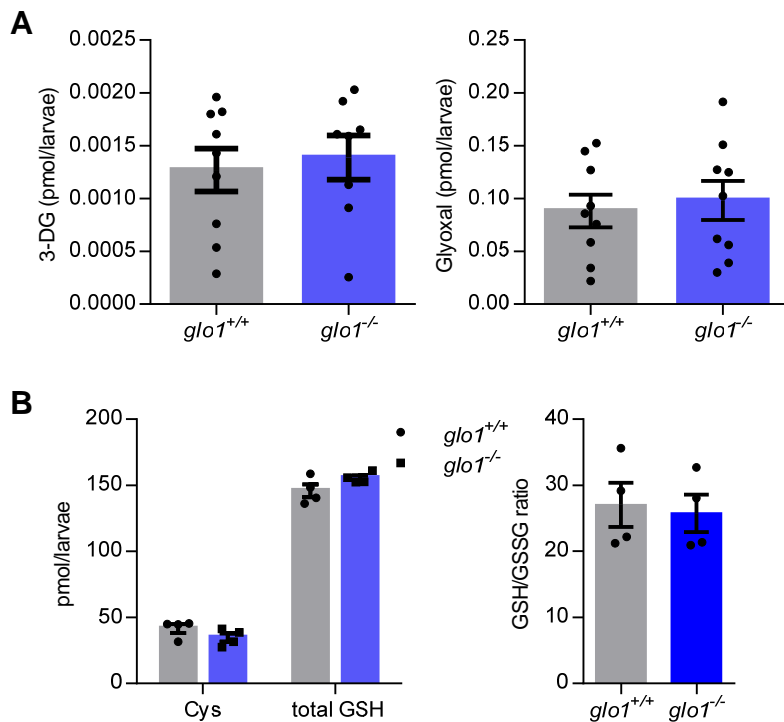

**Supplemental Figure 1. 3-Deoxyglucosone, glyoxal and thiol levels are unaltered in *glo1*<sup>-/-</sup> larvae at 96 hpf.** (A) 3-DG and glyoxal were determined by LC-MS/MS in zebrafish lysates at 96 hpf; *n* = 9 clutches with 35 larvae; mean ± SE. (B) No significant alterations in the GSH/GSSG ratio or cysteine levels are observed in *glo1*<sup>-/-</sup> larvae at 96 hpf. Cysteine, GSH and GSSG were determined using UPLC-FSR in zebrafish lysates at 96 hpf; *n* = 4 clutches with 40 larvae; mean ± SE. For statistical analysis Mann-Whitney U-test (A) and Student's *t*-test (B) were applied. 3-DG: 3-Deoxyglucosone, GSH: glutathione, GSSG: glutathione disulfide.

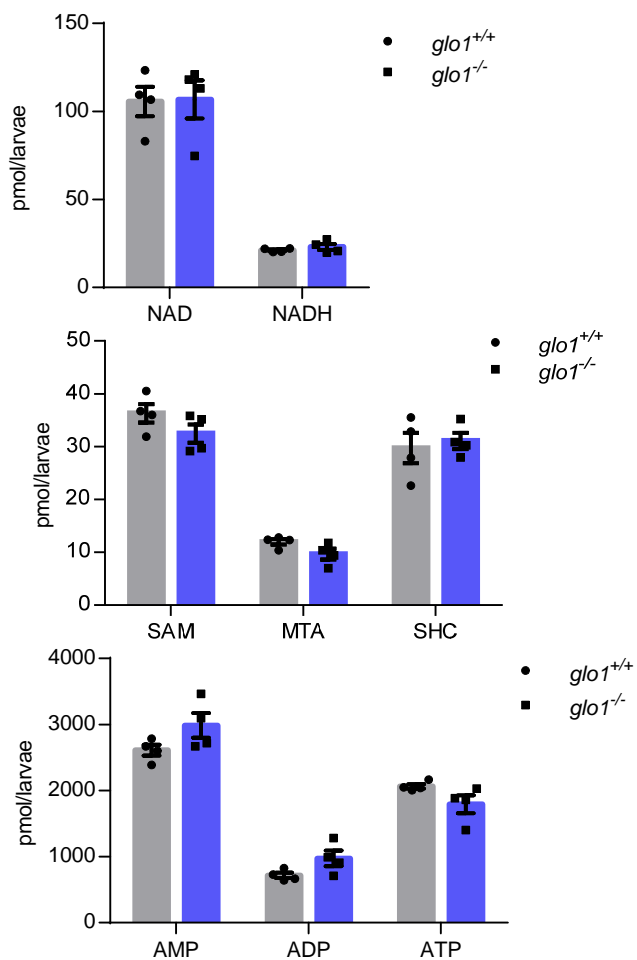

**Supplemental Figure 2. Adenosine derivatives are unaltered in *glo1*<sup>-/-</sup> larvae at 96 hpf.** Adenosines derivatives were determined using UPLC-FSR in zebrafish lysates at 96 hpf; *n* = 4 clutches with 40 larvae; mean ± SE. For statistical analysis Students *t*-test was applied. SAM: S-adenosyl-methionine, MTA: methylthioadenosine, SHC: S-adenosylhomocystein,.

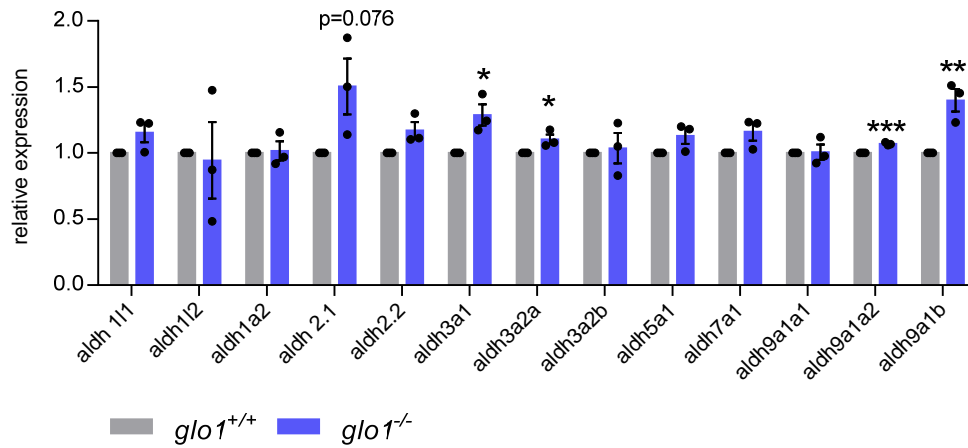

**Supplemental Figure 3. Aldh mRNA levels in *glo1*<sup>-/-</sup> zebrafish larvae.** *Aldh3a1*, *aldh3a2a*, *aldh9a1a2* and *aldh9a1b* mRNA levels are increased in *glo1*<sup>-/-</sup> zebrafish embryos in comparison to *glo1*<sup>+/+</sup> zebrafish embryos. Expression of mRNA was analysed by RT-qPCR at 72 hpf and expression was normalized to beta-actin. Values for *glo1*<sup>+/+</sup> zebrafish embryos were standardized to 1.; *n* = 3 clutches with 35-50 larvae per group; mean  $\pm$  SE. For statistical analysis Student's *t*-test was applied \**p*<0.05, \*\**p*<0.01, \*\*\**p*<0.001. Aldh: aldehyde-dehydrogenase.

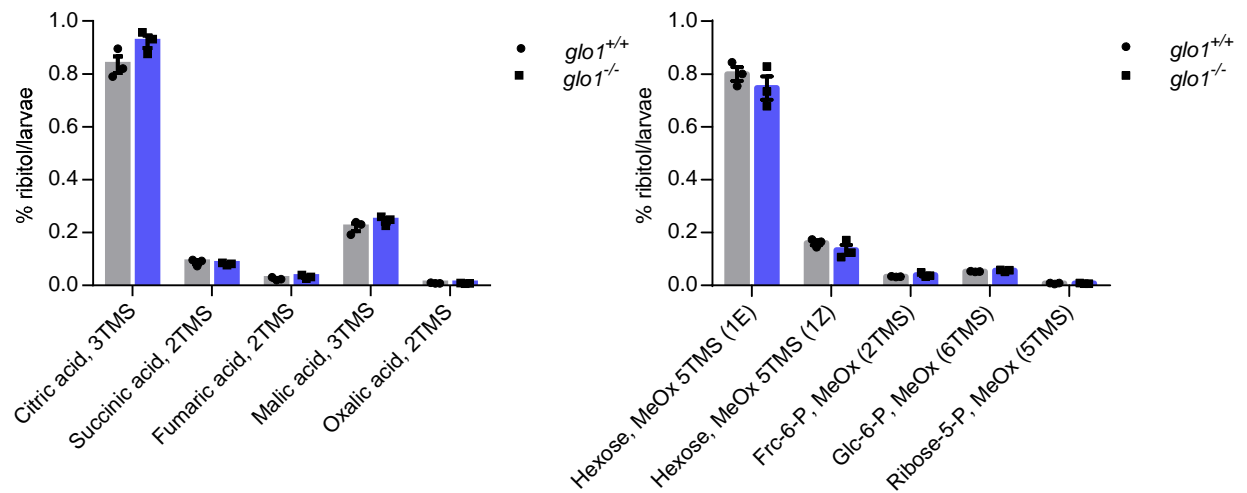

**Supplemental Figure 4. Citric acid cycle intermediates and sugar levels are unaltered in *glo1*<sup>-/-</sup> larvae at 96 hpf.** Intermediates were determined using GC/MS analysis in zebrafish lysates at 96 hpf;  $n = 3$  clutches with 40 larvae; mean  $\pm$  SE. For statistical analysis Students *t*-test was applied. TMS: trimethylsilyl.

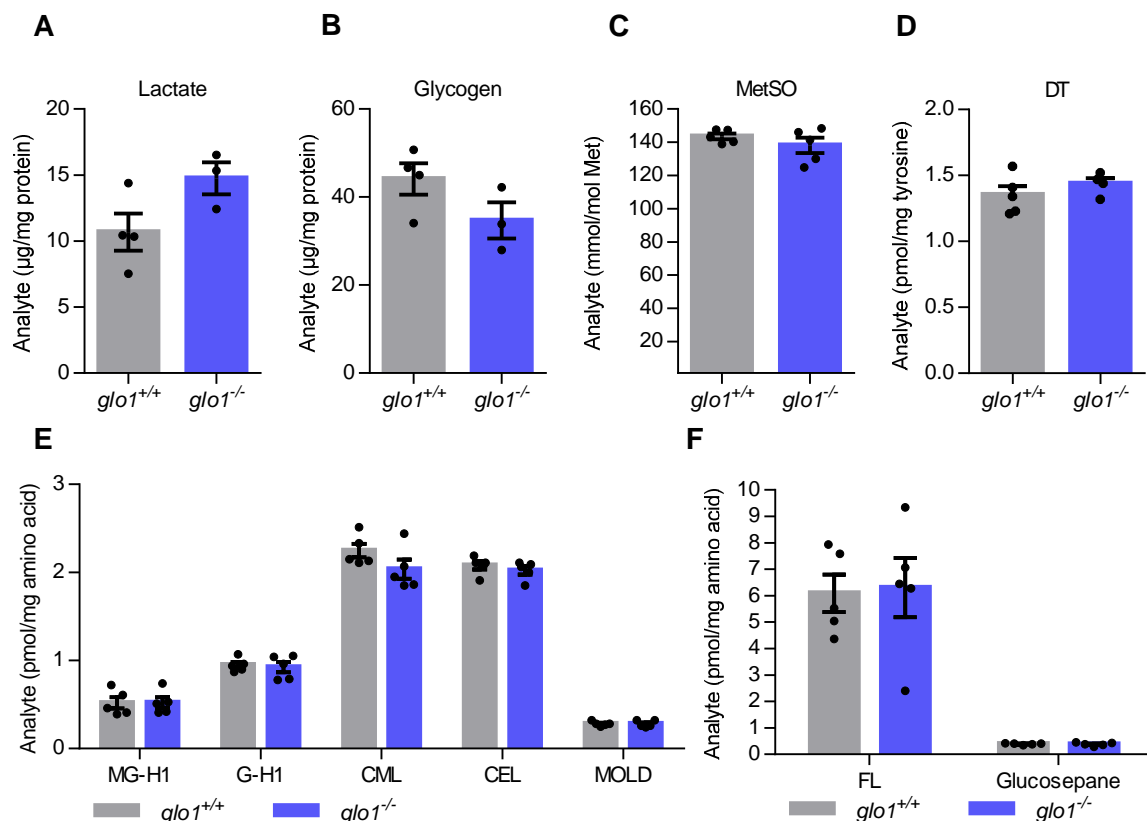

**Supplemental Figure 5. Lactate, glycogen, glycation and oxidation products are unaltered in livers of *glo1*<sup>-/-</sup> zebrafish.** (A) L-lactate was determined using an endpoint enzymatic assay with L-lactate in liver lysates of zebrafish; *n* = 3-4 livers per group; mean ± SE. (B) Glycogen was measured using glycogen assay kit; *n* = 3-4 livers per group; mean ± SE. (C-F) AGEs and oxidation products were determined by exhaustive enzymatic hydrolysis and LC-MS/MS; *n* = 4-5 livers per group; mean ± SE. (A-F) For statistical analysis Student's *t*-test was applied. MG-H1: Methylglyoxal-derived hydroimidazolone, G-H1: Glyoxal-derived hydroimidazolone, CML: N(epsilon)-(carboxymethyl)lysine, CEL: N(epsilon)-(carboxyethyl)lysine, MOLD: Methylglyoxal lysine dimer, DT: Dityrosine, FL: Fructose lysine, MetSO: Methionine sulphoxid.

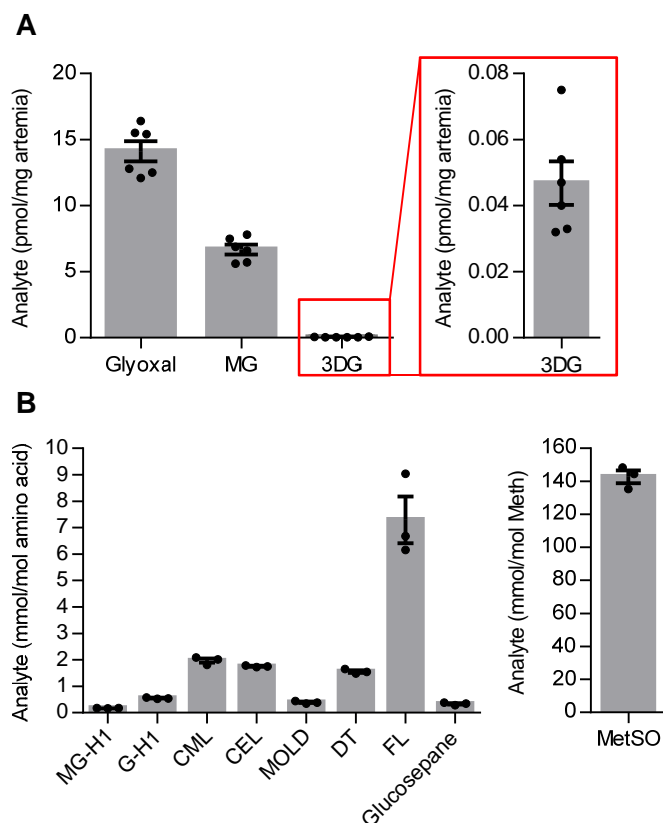

**Supplemental Figure 6. Dicarbonyl, AGE and oxidation product levels in *Artemia*.** (A) Methylglyoxal, glyoxal and 3-DG levels were determined by LC-MS/MS in *Artemia* which were hatched for two days;  $n = 6$  batches of *Artemia*; mean  $\pm$  SE. (B) The AGE and oxidation adduct content of *Artemia*, which were hatched for two days, was determined by exhaustive enzymatic hydrolysis and LC-MS/MS;  $n = 3$  batches of *Artemia*. MG-H1: Methylglyoxal-derived hydroimidazolone, G-H1: Glyoxal-derived hydroimidazolone, CML: N(epsilon)-(carboxymethyl)lysine, CEL: N(epsilon)-(carboxyethyl)lysine, MOLD: Methylglyoxal lysine dimer, DT: Dityrosine, FL: Fructose lysine, MetSO: Methionine sulfoxide.

**Supplemental Table 1. Oligos used for RT-qPCR**

| <b>Oligo</b>         | <b>nucleotide sequence</b> | <b>Detection</b> |
|----------------------|----------------------------|------------------|
| elovl2-q-PCR-for     | TGGACAGCCTATTTGGAGAAA      | SybrGreen        |
| elovl2-q-PCR-rev     | AATGTTGGTGTGTAGGAATCCA     | SybrGreen        |
| fads2-q-PCR-for      | CGTCGCTGTTATTCTGGCTA       | SybrGreen        |
| fads2-q-PCR-rev      | ACGGACAGATGACCGAAGTC,      | SybrGreen        |
| Scd- q-PCR-for       | GGTCCACGTGTTTAGAGCAGT      | SybrGreen        |
| Scd- q-PCR-rev       | GGGTCAAACATCATCCTCCATT     | SybrGreen        |
| Fasn-q-PCR-for       | AGTGTGCCGTGCTATGGACT       | SybrGreen        |
| Fasn- q-PCR-rev      | CGCAGCAAGACTCTGGATACT      | SybrGreen        |
| beta-actin-q-PCR-for | ACGGTCAGGTCATCACCATC       | SybrGreen        |
| beta-actin-q-PCR-rev | TGGATACCGCAAGATTCCAT       | SybrGreen        |
| aldh1a2-q-PCR-for    | AACCACTGAACACGGACCTC       | UPL #68          |
| aldh1a2-qPCR-rev     | ATGAGCTCCAGCACACGTC        | UPL #68          |
| aldh1l1-qPCR-for     | GCTGCCCAGACACAGAGG         | UPL #44          |
| aldh1l1-qPCR-rev     | AACCCTCCCTTCTTATCACCA      | UPL #44          |
| aldh1l2-qPCR-for     | AGCCGCTTCAATGGATGTAG       | UPL #22          |
| aldh1l2-qPCR-rev     | GAACACCAGCGCATTTCTG        | UPL #22          |
| aldh2.1-qPCR-for     | CGCACTGTATATCGCCAGTTTA     | SybrGreen        |
| aldh2.1-qPCR-rev     | GGACCAAACCCTGGGATAAT       | SybrGreen        |
| aldh2.2-qPCR-for     | TGCAGTCTCCTTCAGTGTGG       | SybrGreen        |
| aldh2.2-qPCR-rev     | TGCCCAGCCAGCATAATAC        | SybrGreen        |
| aldh3a1-qPCR-for     | CACTGTTGATACTTTACCTTTTGGAG | SybrGreen        |
| aldh3a1-qPCR-rev     | CAAACGTGTGTTTCCCATGA       | SybrGreen        |
| aldh3a2a-qPCR-for    | TGATGAATCTGAGTGTTACATTGC   | SybrGreen        |
| aldh3a2a-qPCR-rev    | TGGCCCAAAGATCTCTTCC        | SybrGreen        |
| aldh3a2b-qPCR-for    | CACTTCTCTGTCAGCTCTCTGC     | UPL #22          |
| aldh3a2b-qPCR-rev    | GATAGCGGCCCATACCACT        | UPL #22          |
| aldh5a1-qPCR-for     | GGGCCTCTTATCAACTCACG       | UPL #39          |
| aldh5a1-qPCR-rev     | TCCATGATCCACAGCGTCT        | UPL #39          |
| aldh7a1-qPCR-for     | AACCGCAGCACCGAATATGT       | SybrGreen        |
| aldh7a1-qPCR-rev     | TCTGCTATGGTTGCCTGACG       | SybrGreen        |
| aldh9a1a.1-qPCR-for  | GCTCTGTTCGAAATCTGTGTTCC    | SybrGreen        |
| aldh9a1a.1-qPCR-rev  | CGACCAGTTGCTGGCTCGTA       | SybrGreen        |
| aldh9a1a.2-qPCR-for  | TCCCATGGTGGCTAAAGTGT       | SybrGreen        |
| aldh9a1a.2-qPCR-rev  | TAGCTGCCATTTCCAAAACC       | SybrGreen        |
| aldh9a1b-qPCR-for    | GGAGCAAGCCAAGAACGA         | SybrGreen        |
| aldh9a1b-qPCR-rev    | GGATCTGCAGGGCTGAAA         | SybrGreen        |
